# Supplementary material for: Irisin—A Pancreatic Islet Hormone
Source: MDPI journal article supplement (doi:10.3390/biomedicines10020258), 2022-01-25
Supplement: s1 [file s1]

**Table S1.** Sequences and references for primers used.

| Gene        | Orientation       | Primer sequence or commercial primer                                                     |
|-------------|-------------------|------------------------------------------------------------------------------------------|
| FNDC5 Human | F                 | GGCCTCCAAGAACAAAGATGAG                                                                   |
|             | R                 | GCAGAAGAGGGCAATGACAC                                                                     |
| FNDC5 Rat   | F                 | TCTTCATGTGGGCAGGTGTCAT                                                                   |
|             | R                 | GGTGCTGGTCTCTGATGCACT                                                                    |
| GAPDH Human | F                 | GTCAAGGCTGAGAACGGGAA                                                                     |
|             | R                 | AAATGAGCCCCAGCCTTCTC                                                                     |
| GAPDH Rat   | Commercial primer | PrimePCR™ Template for SYBR® Green Assay: Gapdh, Rat (BioRad, Hercules, California, USA) |
| RPS7 Human  | F                 | GAAGTTGGTGGTGGTTCGGAA                                                                    |
|             | R                 | TGCACAGCTGTCAGAGTACG                                                                     |
| RPS7 rat    | Commercial primer | PrimePCR™ Template for SYBR® Green Assay: Rps7, Rat (BioRad, Hercules, California, USA)  |

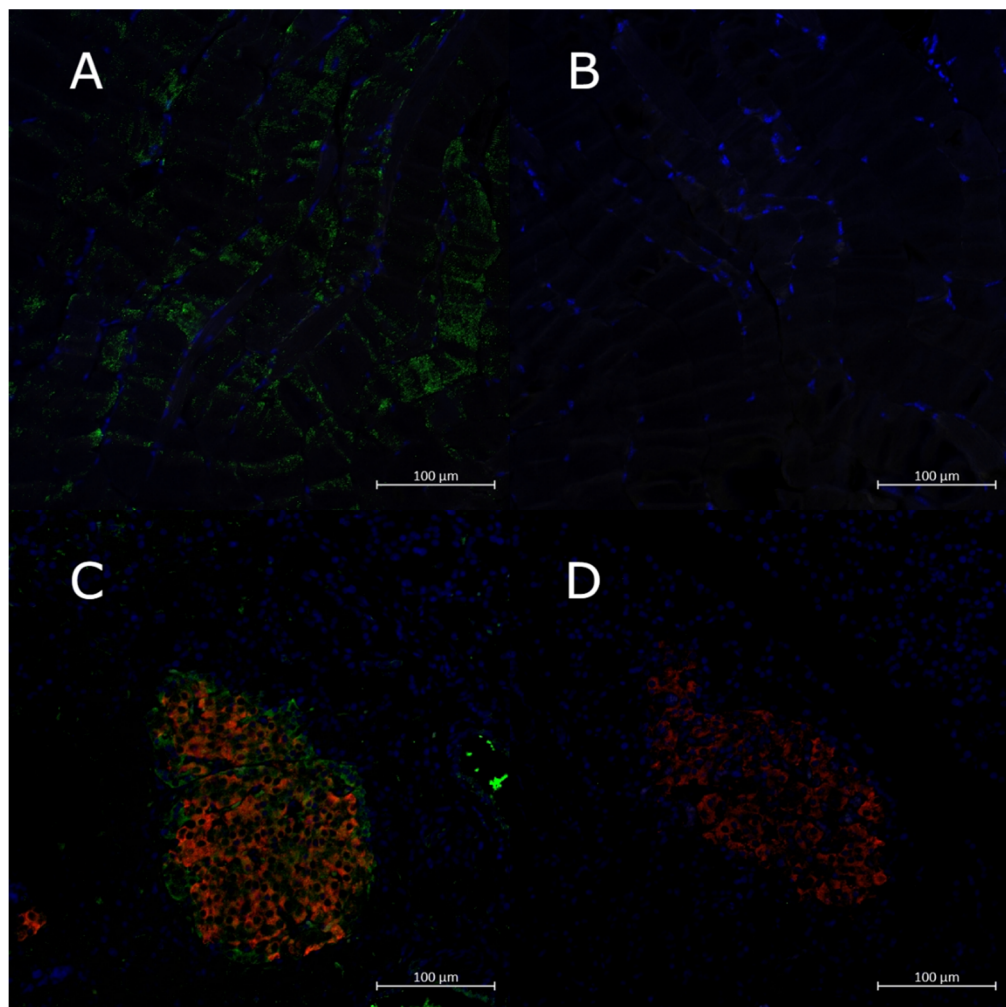

**Figure S1.** (A–B) Skeletal muscle from C57 BL/6 mice stained for FNDC5 and DAPI without recombinant irisin in (A) and with recombinant irisin added to the antibody mix to extinguish the signal in (B); (C–D) Rat islets stained for FNDC5

(green), insulin (red) and DAPI in combined pictures without recombinant irisin in **(C)** and with recombinant irisin in the antibody mix in **(D)**.
